# Supplementary material for: Impact of F-18 Fluorodeoxyglucose PET/CT and PET/MRI on Initial Staging and Changes in Management of Pancreatic Ductal Adenocarcinoma: A Systemic Review and Meta-Analysis
Source: PubMed Central journal article supplement (PMC7696716; doi:10.3390/diagnostics10110952), 2020-11-14
Supplement: diagnostics-10-00952-s001.pdf [file diagnostics-10-00952-s001.pdf]

**Supplementary Table S1.** The queries and results of electronic searches in the PubMed, Embase, Cochrane Library, and KoreaMed databases

**PubMed**

| Date: 2019.11.06 |    |                                                                                                                                                                                                                                                          |            |
|------------------|----|----------------------------------------------------------------------------------------------------------------------------------------------------------------------------------------------------------------------------------------------------------|------------|
| PICOS            | #  | Search queries                                                                                                                                                                                                                                           | Articles # |
| P                | 1  | exp Pancreatic Neoplasms/ OR (pancrea\$ AND (tumo*r OR cancer OR carcinoma OR adenocarcinoma OR malignan\$ OR neoplasm\$ OR cyst)).tw,kw                                                                                                                 | 115646     |
| P                | 2  | (staging OR stage OR diagnosis OR detect\$ OR metastas\$).tw,kw                                                                                                                                                                                          | 4266478    |
| P                | 3  | 1 AND 2                                                                                                                                                                                                                                                  | 46238      |
| I                | 4  | exp Positron-Emission Tomography/ OR (Positron-Emission Tomography OR Positron Emission Tomography OR PET OR PET?CT OR PET-CT OR PET?MRI OR PET-MRI).tw,kw                                                                                               | 120459     |
| P&I              | 5  | 3 AND 4                                                                                                                                                                                                                                                  | 1689       |
| O                | 6  | exp "Sensitivity and Specificity"/ OR (diagnos\$ accuracy OR sensitivity OR specificity OR Receiver operating characteristic OR ROC curve OR Area under the curve OR AUC OR added value OR diagnostic yield OR prognosis OR predict\$ OR accuracy).tw,kw | 2937041    |
| Limit            | 7  | 5 AND 6                                                                                                                                                                                                                                                  | 703        |
| Case report      | 8  | case report\$.pt                                                                                                                                                                                                                                         | 2052847    |
| Final            | 9  | 7 not 8                                                                                                                                                                                                                                                  | 649        |
| Time             | 10 | limit 9 to yr="2000 -Current"                                                                                                                                                                                                                            | 610        |

**Embase**

| Date: 2019.11.06 |   |                                                                                                                                                                            |            |
|------------------|---|----------------------------------------------------------------------------------------------------------------------------------------------------------------------------|------------|
| PICOS            | # | Search queries                                                                                                                                                             | Articles # |
| P                | 1 | 'pancreas tumor'/mj OR (pancrea* AND (tumo*r OR cancer OR carcinoma OR adenocarcinoma OR malignan* OR neoplasm* OR cyst)):ab,ti,kw                                         | 157859     |
| P                | 2 | (staging OR stage OR diagnosis OR detect* OR metastas*):ab,ti,kw                                                                                                           | 3854486    |
| P                | 3 | #1 AND #2                                                                                                                                                                  | 73184      |
| I                | 4 | 'positron emission tomography'/exp OR ('Positron-Emission Tomography' OR 'Positron Emission Tomography' OR PET OR 'PET CT' OR 'PET-CT' OR 'PET MRI' OR 'PET-MRI'):ab,ti,kw | 233809     |
| P&I              | 5 | #3 AND #4                                                                                                                                                                  | 3719       |
| O                | 6 | 'sensitivity and specificity'/exp OR ('diagnos* accuracy' OR sensitivity                                                                                                   | 2937041    |

|       |   |                                                                                                                                                                                             |      |
|-------|---|---------------------------------------------------------------------------------------------------------------------------------------------------------------------------------------------|------|
|       |   | OR specificity OR 'Receiver operating characteristic' OR 'ROC curve' OR 'Area under the curve' OR AUC OR 'added value' OR 'diagnostic yield' OR prognosis OR predict* OR accuracy):ab,ti,kw |      |
| Limit | 7 | 5 AND 6                                                                                                                                                                                     | 1455 |
| Final | 8 | #7 AND ('article'/it OR 'article in press'/it OR 'review'/it)                                                                                                                               | 778  |
| Time  | 9 | #8 AND [2000-2019]/py                                                                                                                                                                       | 747  |

### Cochrane Library

| Date: 2019.11.06 |    |                                                                                                                                                                                                                        |            |
|------------------|----|------------------------------------------------------------------------------------------------------------------------------------------------------------------------------------------------------------------------|------------|
| PICOS            | #  | Search queries                                                                                                                                                                                                         | Articles # |
| P                | 1  | (pancrea* AND (tumo*r OR cancer OR carcinoma OR adenocarcinoma OR malignan* OR neoplasm* OR cyst))                                                                                                                     | 7792       |
| P                | 2  | MeSH descriptor: [Pancreatic Neoplasms] explode all trees                                                                                                                                                              | 1546       |
| P                | 3  | #1 OR #2                                                                                                                                                                                                               | 7801       |
| P                | 4  | (staging OR stage OR diagnosis OR detect* OR metastas*)                                                                                                                                                                | 292139     |
| P                | 5  | #3 AND #4                                                                                                                                                                                                              | 3568       |
| I                | 6  | ('Positron-Emission Tomography' OR 'Positron Emission Tomography' OR PET OR 'PET CT' OR 'PET-CT' OR 'PET MRI' OR 'PET-MRI')                                                                                            | 8206       |
| I                | 7  | MeSH descriptor: [Positron-Emission Tomography] explode all trees                                                                                                                                                      | 1018       |
| I                | 8  | #6 OR #7                                                                                                                                                                                                               | 8206       |
| P&I              | 9  | #5 AND #8                                                                                                                                                                                                              | 155        |
| O                | 10 | ('diagnos* accuracy' OR sensitivity OR specificity OR 'Receiver operating characteristic' OR 'ROC curve' OR 'Area under the curve' OR AUC OR 'added value' OR 'diagnostic yield' OR prognosis OR predict* OR accuracy) | 259885     |
| O                | 11 | MESH sensitivity and specificity                                                                                                                                                                                       | 16229      |
| O                | 12 | #10 OR #11                                                                                                                                                                                                             | 259955     |
| Limit            | 13 | #9 AND 12                                                                                                                                                                                                              | 90         |
| Final            | 14 | #13 AND Cochrane Review, Trial with Cochrane Library publication date from Jan 2000 to Nov 2019                                                                                                                        | 88         |

### KoreaMed

| Date: 2019.11.06 |   |                                                                                                                              |            |
|------------------|---|------------------------------------------------------------------------------------------------------------------------------|------------|
| PICOS            | # | Search queries                                                                                                               | Articles # |
|                  | 2 | (( staging OR stage OR (MeSH_Terms:"Diagnosis" OR All_Fields:"Diagnosis") OR detect* OR metastas* ) : ) AND ( ( pancrea* AND | 11         |

|  |                                                                                                                                                                                                                                                                                                                                                                                                                                                      |  |
|--|------------------------------------------------------------------------------------------------------------------------------------------------------------------------------------------------------------------------------------------------------------------------------------------------------------------------------------------------------------------------------------------------------------------------------------------------------|--|
|  | ( tumo*r OR (MeSH_Terms:"Neoplasms" OR All_Fields:"Neoplasms" OR All_Fields:"cancer") OR (MeSH_Terms:"Carcinoma" OR All_Fields:"Carcinoma") OR (MeSH_Terms:"Adenocarcinoma" OR All_Fields:"Adenocarcinoma") OR malignan* OR neoplasm* OR (MeSH_Terms:"Cysts" OR All_Fields:"Cysts" OR All_Fields:"cyst") ) ) : ) AND ( 'Positron-Emission Tomography' OR 'Positron Emission Tomography' OR PET OR 'PET CT' OR 'PET-CT' OR 'PET MRI' OR 'PET-MRI' ) : |  |
|--|------------------------------------------------------------------------------------------------------------------------------------------------------------------------------------------------------------------------------------------------------------------------------------------------------------------------------------------------------------------------------------------------------------------------------------------------------|--|

**Supplementary Table S2.** Quality assessment of included studies using the QUADAS-2 tool.

| First author<br>(year) | Risk of bias      |            |                    |                 | Applicability concerns |            |                    |
|------------------------|-------------------|------------|--------------------|-----------------|------------------------|------------|--------------------|
|                        | Patient selection | Index test | Reference standard | Flow and timing | Patient selection      | Index test | Reference standard |
| Crippa (2014)          | Low               | Unclear    | Low                | Low             | Low                    | Low        | Low                |
| Ghaneh (2018)          | Low               | Low        | Low                | Low             | Low                    | Low        | Low                |
| Heinrich (2005)        | Low               | Low        | Low                | Unclear         | Low                    | Low        | Low                |
| Joo (2017)             | Low               | Low        | Unclear            | Low             | Low                    | Low        | Unclear            |
| Kim (2012)             | Unclear           | Unclear    | High               | Unclear         | Low                    | Unclear    | Low                |
| Kim (2018)             | Unclear           | Low        | Low                | Low             | Low                    | Low        | Low                |
| Santhosh (2017)        | High              | Low        | Low                | Unclear         | High                   | Low        | Low                |
| Strobel (2008)         | High              | Low        | Low                | Unclear         | Low                    | Low        | Low                |
| Wang (2014)            | Unclear           | Low        | Low                | Low             | Low                    | Low        | Low                |
| Yoneyama (2014)        | Unclear           | Low        | Unclear            | Unclear         | Low                    | Low        | Low                |

High, high risk; Low, low risk; QUADAS-2, the Quality Assessment of Diagnostic Accuracy Studies-2; Unclear, unclear risk
